# Supplementary material for: Layperson-Oriented versus Clinical-Based Models for Assessing 10-Year Incidence of Coronary Heart Disease: National FINRISK Study
Source: Hindawi journal article supplement (doi:10.1155/2011/823782), 2011-01-01

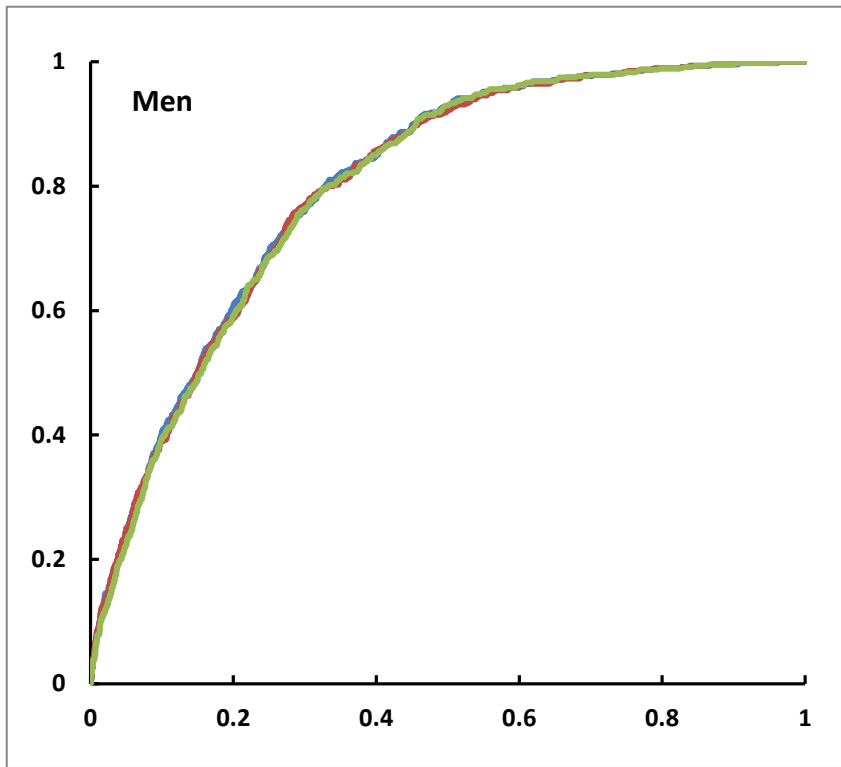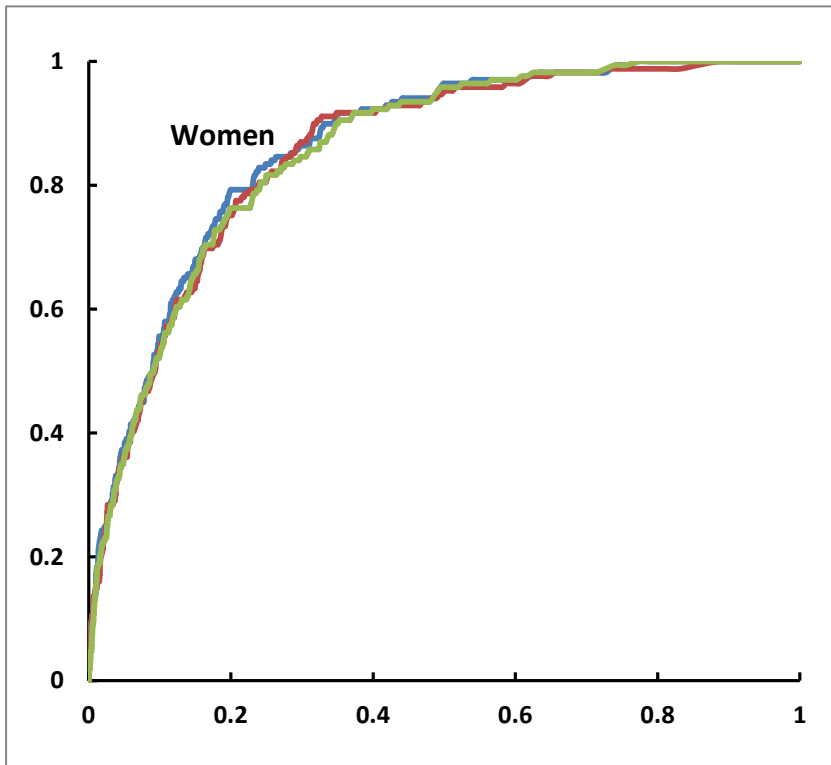

Supplement: f2 [file 823782.f2.pdf]
